# Supplementary material for: A Superior Lithium-Ion Capacitor Based on Ultrafine MnO/Dual N-Doped Carbon Anode and Porous Carbon Cathode
Source: MDPI journal article supplement (doi:10.3390/batteries9050241), 2023-04-24
Supplement: s1 [file s1]

## ***Supplementary Materials***

### **A superior lithium-ion capacitor based on ultrafine MnO/dual N-doped carbon anode and porous carbon cathode**

*Da Lei<sup>1, †</sup>, Yuyang Gao<sup>1, †</sup>, Zhidong Hou<sup>1</sup>, Lingbo Ren<sup>1</sup>, Mingwei Jiang<sup>1</sup>, Yunjing Cao<sup>1</sup>, Yu*

*Zhang<sup>2, \*</sup>, Jian-Gan Wang<sup>1, \*</sup>*

<sup>1</sup> State Key Laboratory of Solidification Processing, Shaanxi Joint Lab of Graphene, School of Materials Science and Engineering, Northwestern Polytechnical University, No. 127, Youyi West Road, Xi'an 710072, China

<sup>2</sup> School of Mechanical and Power Engineering, East China University of Science and Technology, 130 Meilong Road, Shanghai 200237, China

\* Correspondence: wangjiangan@nwpu.edu.cn (J.-G. Wang); yzhang071@ecust.edu.cn (Y. Zhang)

<sup>†</sup> These authors contributed equally to this work

## Supplementary Figures and Tables

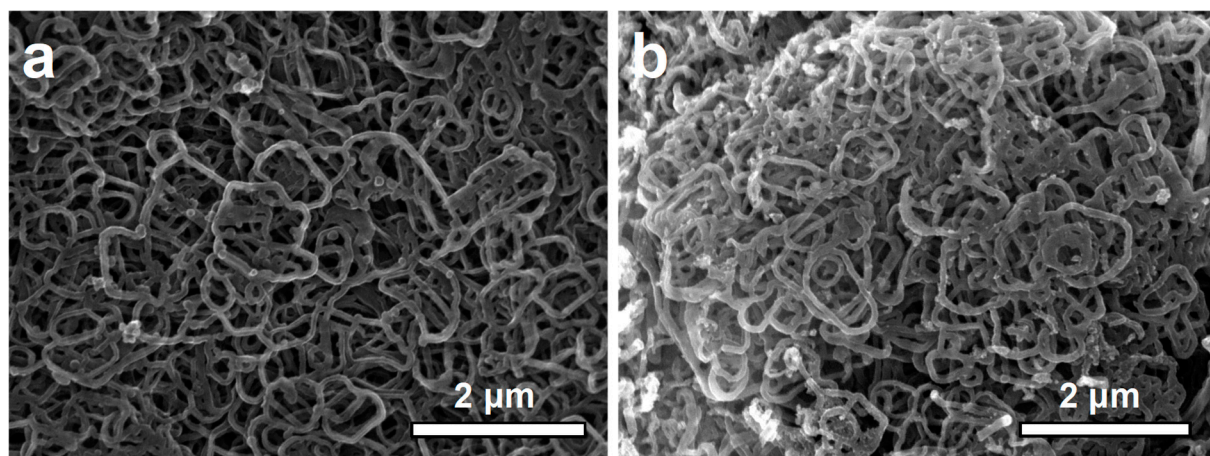

**Figure S1.** SEM images of (a) PPy and (b) MnO/DNC at different magnification.

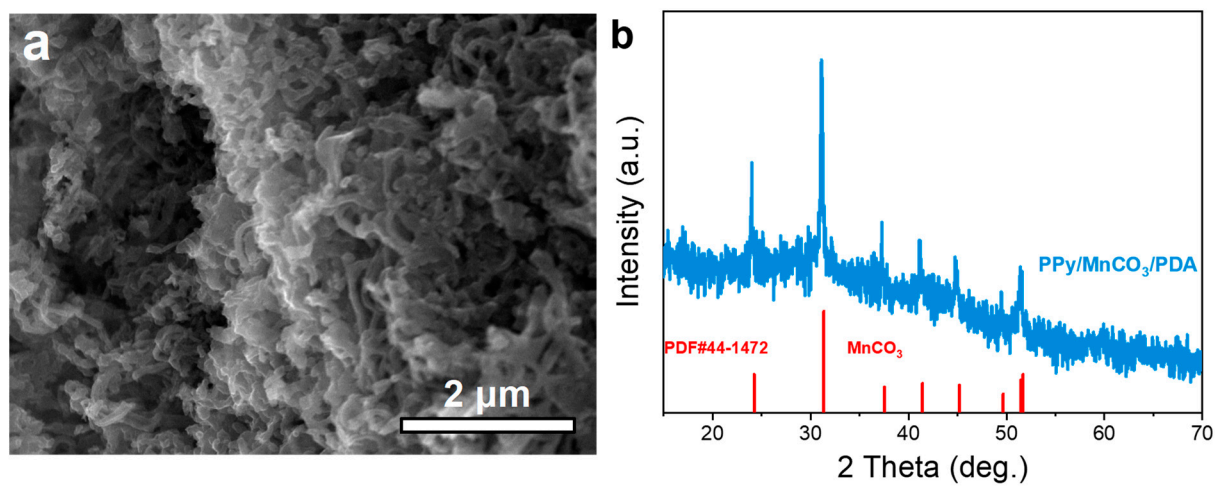

**Figure S2.** (a) SEM image and (b) XRD pattern of PPy/MnCO<sub>3</sub>/PDA.

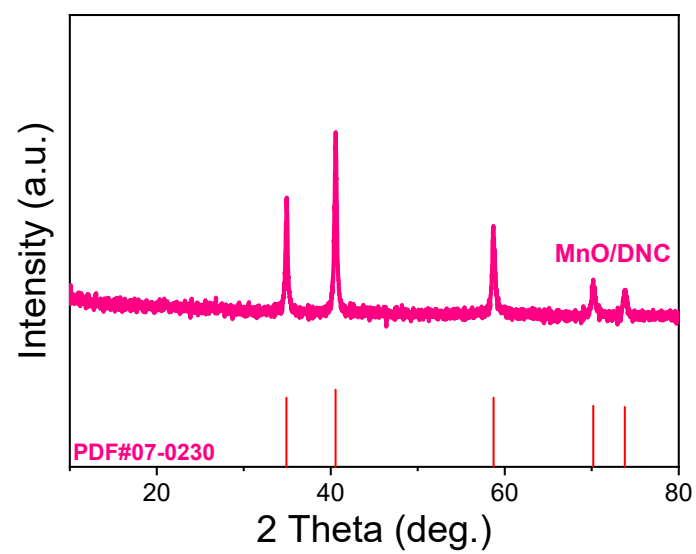

**Figure S3.** XRD pattern of MnO/DNC.

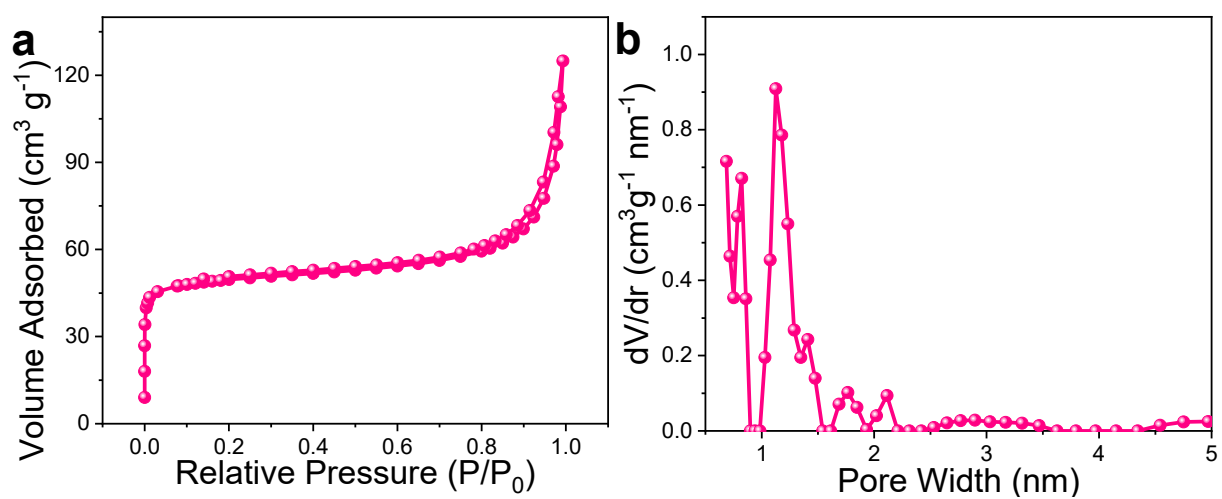

**Figure S4.** (a) BET curve and (b) the corresponding pore-size distribution of MnO/DNC.

**Table S1.** The comparison of present work with other reported MnO-based anodes.

| Sample                    | Rate<br>performance                                                                                       | Current<br>density<br>(A g <sup>-1</sup> ) | Cycle<br>number | Capacity retention (mAh g <sup>-1</sup> ) | Ref.                 |
|---------------------------|-----------------------------------------------------------------------------------------------------------|--------------------------------------------|-----------------|-------------------------------------------|----------------------|
| MnO/DNC                   | 406mAh g <sup>-1</sup><br>(@2 A g <sup>-1</sup> )<br>/179 mAh g <sup>-1</sup><br>(@10 A g <sup>-1</sup> ) | 0.1/2                                      | 100/500         | 682(95%)<br>/393(97%)                     | <b>This<br/>work</b> |
| MnO/C aerogel             | 601 mAh g <sup>-1</sup><br>(@2 A g <sup>-1</sup> )                                                        | 0.2                                        | 140             | 1177(150%)                                | [S1]                 |
| MnO@C<br>nanoplates       | 770 mAh g <sup>-1</sup><br>(@0.2 A g <sup>-1</sup> )                                                      | 0.2                                        | 30              | 563(73%)                                  | [S2]                 |
| MnO@C<br>microspheres     | 238 mAh g <sup>-1</sup><br>(@0.8 A g <sup>-1</sup> )                                                      | 0.1                                        | 100             | 525(82%)                                  | [S3]                 |
| MnO/NC<br>nanorods        | 49 mAh g <sup>-1</sup><br>(@5 A g <sup>-1</sup> )                                                         | 1                                          | 600             | 570                                       | [S4]                 |
| MnO-Cu-CNT<br>/graphene   | 432 mAh g <sup>-1</sup><br>(@3.2 A g <sup>-1</sup> )                                                      | 0.1                                        | 50              | 857(110%)                                 | [S5]                 |
| Fusiform MnO<br>particles | 203 mAh g <sup>-1</sup><br>(@2 A g <sup>-1</sup> )                                                        | 0.1                                        | 100             | 747                                       | [S6]                 |
| MnO/C<br>nanowires        | 315 mAh g <sup>-1</sup><br>(@2 A g <sup>-1</sup> )                                                        | 1                                          | 600             | 480                                       | [S7]                 |
| MnO@C<br>nanofibers       | 328 mAh g <sup>-1</sup><br>(@4 A g <sup>-1</sup> )                                                        | 0.5                                        | 200             | 156%                                      | [S8]                 |

**Table S2.** Fitted impedance parameters and equivalent circuit.

| Sample  | $R_s$ ( $\Omega$ ) | $R_{ct}$ ( $\Omega$ ) |
|---------|--------------------|-----------------------|
| NC      | 0.7                | 51.2                  |
| MnO/DNC | 1.9                | 71.6                  |

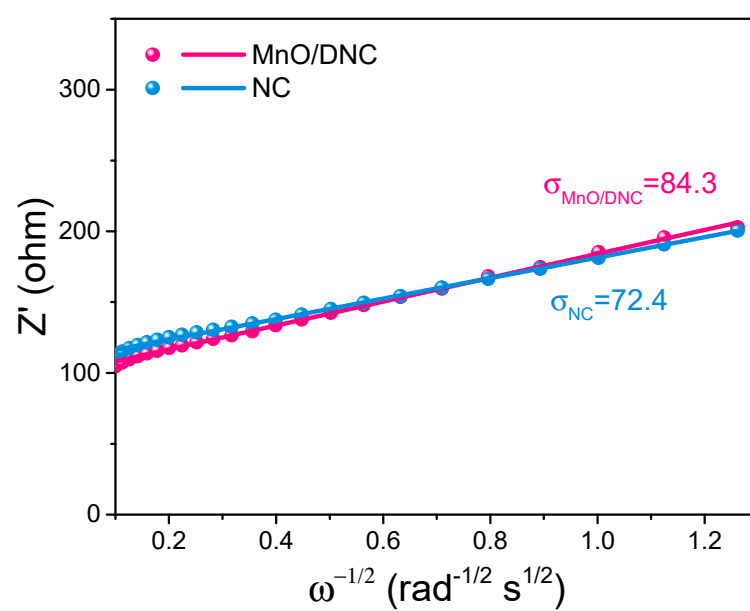

**Figure S5.** The linear relationship between  $Z'$  and the  $\omega^{-1/2}$  of NC and MnO/DNC.



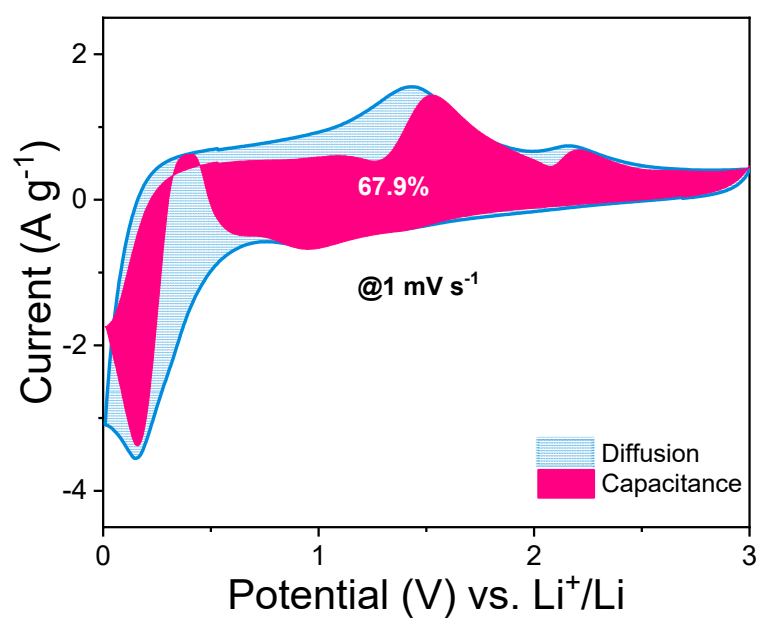

**Figure S6.** Capacitive contribution (pink region) of the MnO/DNC electrode at 1 mV s<sup>-1</sup>.

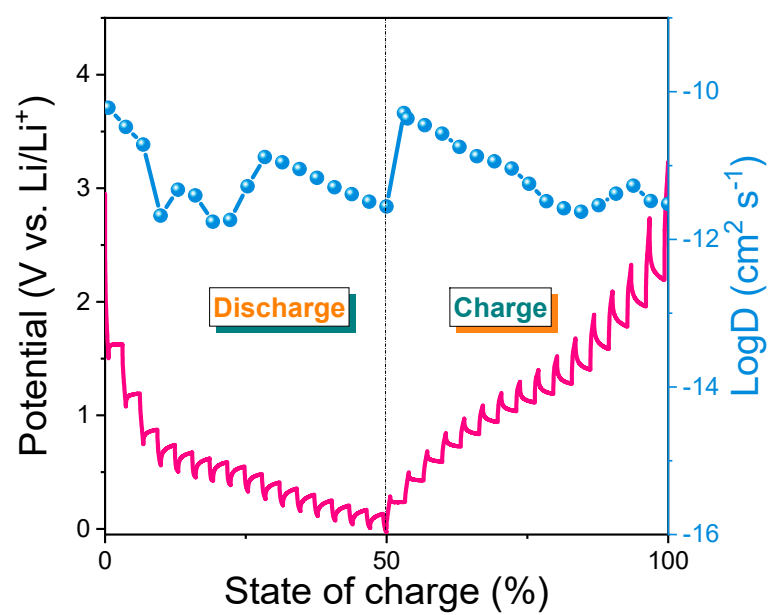

**Figure S7.** GITT curve and calculated  $D_{Li^+}$  of MnO/DNC.

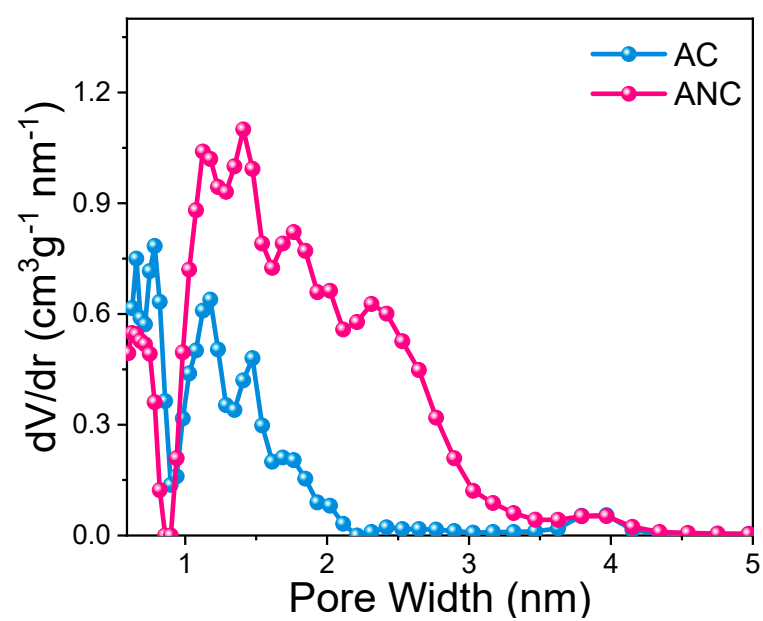

**Figure S8.** The corresponding pore-size distribution of AC and ANC.

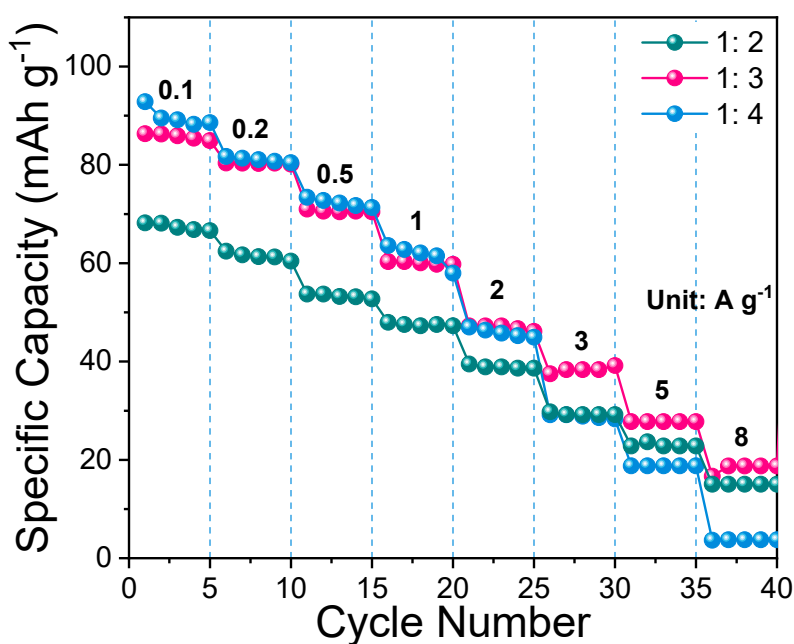

**Figure S9.** Rate capabilities of MnO/DNC//ANC LICs with different mass ratios

## Reference

- [S1] Liu, R.; Chen, X.; Zhou, C.; Li, A.; Gong, Y.; Muhammad, N.; Song, H. Controlled synthesis of porous 3D interconnected MnO/C composite aerogel and their excellent lithium-storage properties. *Electrochim. Acta* **2019**, *306*, 143-150, doi:10.1016/j.electacta.2019.03.129.
- [S2] Zhang, X.; Xing, Z.; Wang, L.; Zhu, Y.; Li, Q.; Liang, J.; Yu, Y.; Huang, T.; Tang, K.; Qian, Y.; et al. Synthesis of MnO@C core-shell nanoplates with controllable shell thickness and their electrochemical performance for lithium-ion batteries. *Journal of Materials Chemistry* **2012**, *22*, 17864, doi:10.1039/c2jm32421k.
- [S3] Guo, S.; Lu, G.; Qiu, S.; Liu, J.; Wang, X.; He, C.; Wei, H.; Yan, X.; Guo, Z. Carbon-coated MnO microparticulate porous nanocomposites serving as anode materials with enhanced electrochemical performances. *Nano Energy* **2014**, *9*, 41-49, doi:10.1016/j.nanoen.2014.06.025.
- [S4] Wang, Y.; Chen, X.; Liu, Z.; Wu, H.; Zhao, H.; Liu, H.; Zhang, Y. Cycling-induced structure refinement of MnO nanorods wrapped by N-doped carbon with internal void space for advanced lithium-ion anodes. *Appl. Surf. Sci.* **2019**, *479*, 386-394, doi:10.1016/j.apsusc.2019.02.144.
- [S5] Wang, J.; Deng, Q.; Li, M.; Jiang, K.; Hu, Z.; Chu, J. High-capacity and long-life lithium storage boosted by pseudocapacitance in three-dimensional MnO-Cu-CNT/graphene anodes. *Nanoscale* **2018**, *10*, 2944-2954, doi:10.1039/c7nr08191j.

- [S6] Pei, X.; Mo, D.; Lyu, S.; Zhang, J.; Fu, Y. Preparation of novel two-stage structure MnO micrometer particles as lithium-ion battery anode materials. *RSC Adv.* **2018**, *8*, 28518-28524, doi:10.1039/c8ra03051k.
- [S7] Wang, J.; Zhang, C.; Jin, D.; Xie, K.; Wei, B. Synthesis of ultralong MnO/C coaxial nanowires as freestanding anodes for high-performance lithium ion batteries. *J. Mater. Chem. A* **2015**, *3*, 13699-13705, doi:10.1039/c5ta02440d.
- [S8] Chen, Z.; He, B.; Yan, D.; Yu, X.; Li, W. Peapod-like MnO@hollow carbon nanofibers film as self-standing electrode for Li-ion capacitors with enhanced rate capacity. *J. Power Sources* **2020**, *472*, 228501, doi:10.1016/j.jpowsour.2020.228501.
